# Supplementary material
Source: Springer Nature journal article supplement (https://www.springermedizin.de/resource/supplementary/13037_2009_54_MOESM1_ESM.pdf/9659214)

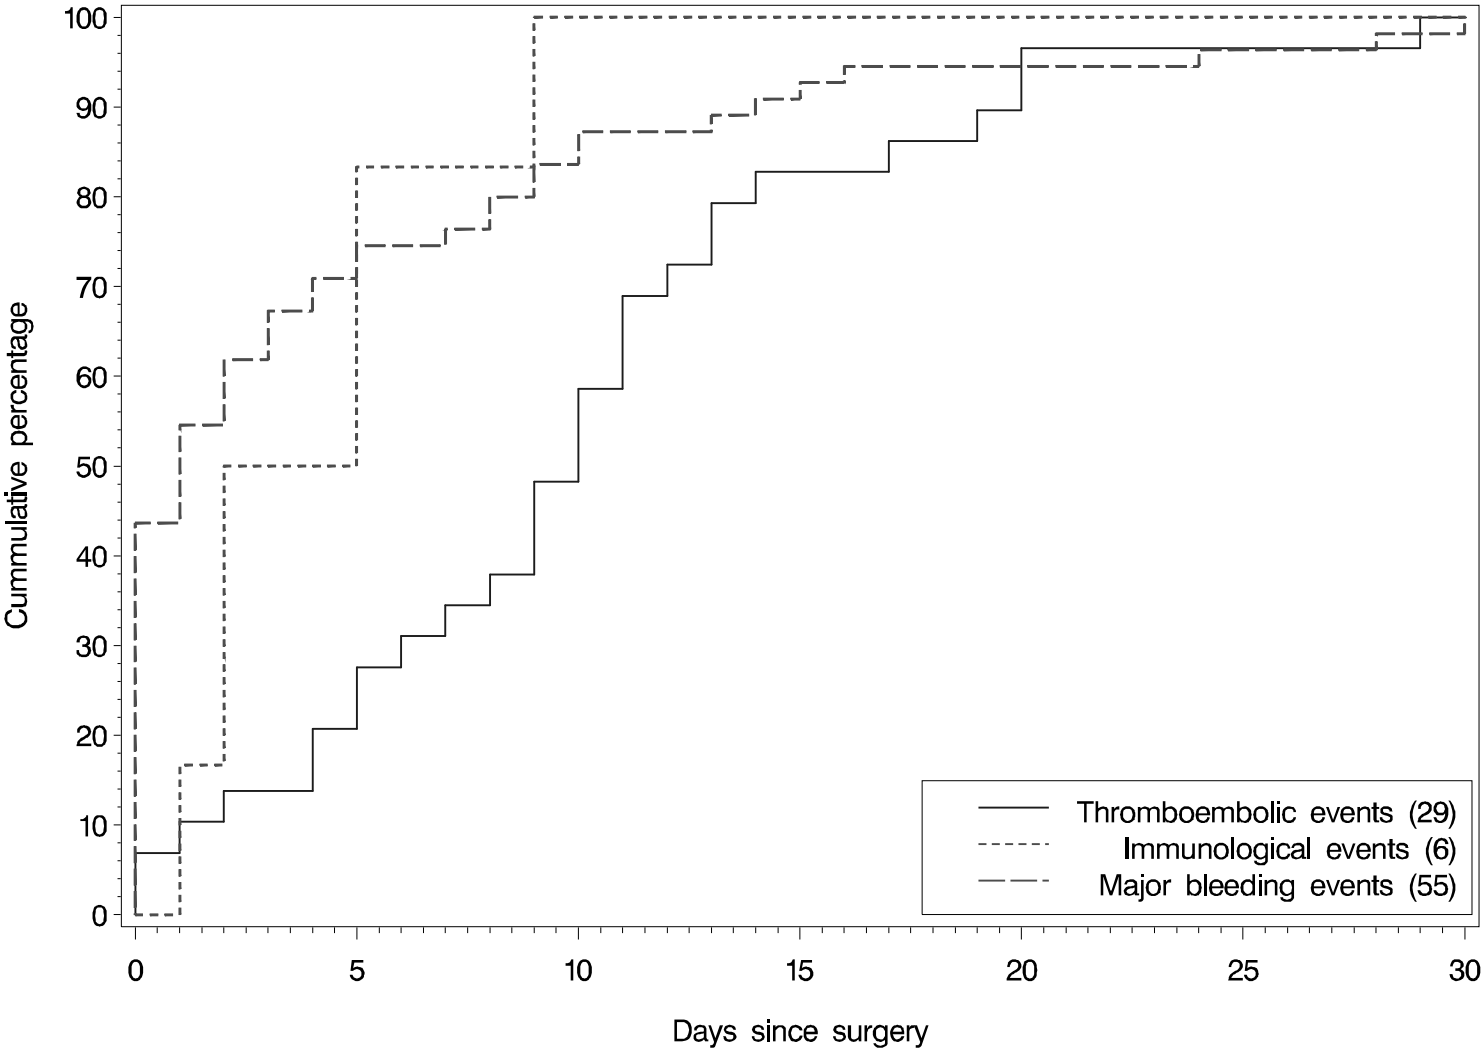

Supplement: MOESM1 [file 9659214]
